# Supplementary material
Source: publisher figshare collection journal article supplement (https://acs.figshare.com/ndownloader/files/4442674)
Supplement: Supplementary file 1 [file 4442674]

## Supporting Information Available:

**Table 1.** EDS and ICP-AES analysis of TM doped ZnO nanorods.

| TM | Initial Precursor<br>(mol %) | EDS $\pm$ error%<br>(atom %) | ICP-AES<br>(atom %) | Std. Deviation<br>( $\sigma \pm$ atom %) |
|----|------------------------------|------------------------------|---------------------|------------------------------------------|
| Mn | 5                            | 1.4 $\pm$ 0.29               | 1.14                | 0.021                                    |
| Co | 5                            | 2 $\pm$ 0.38                 | 1.69                | 0.031                                    |

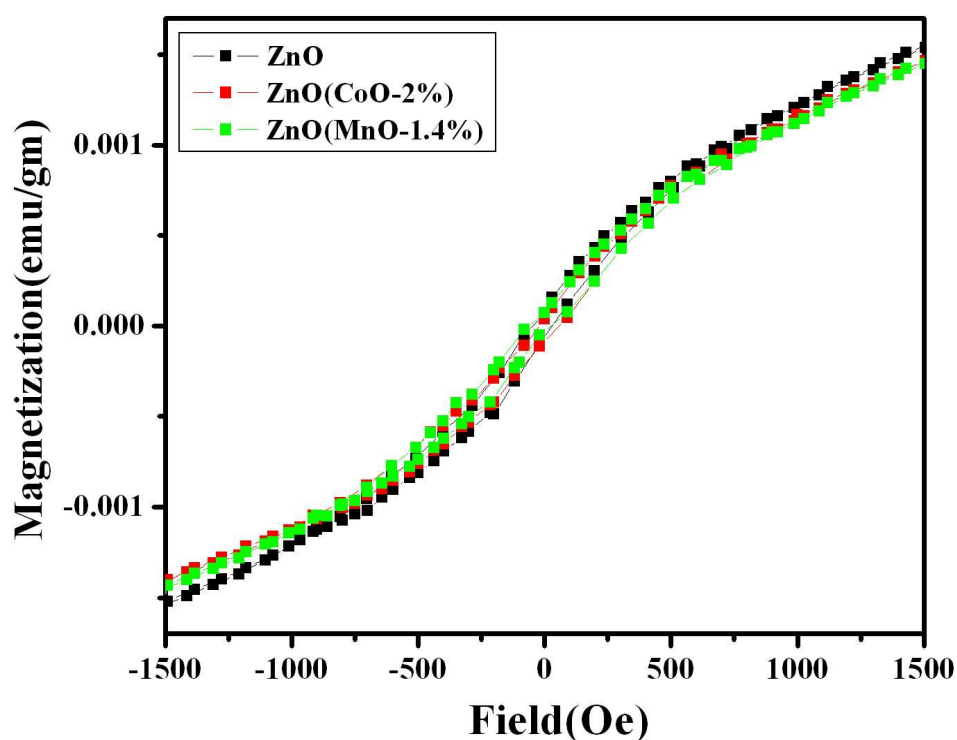

**Figure:** Magnetization ( $M$ - $H$  Curve) behaviour of pure ZnO, and MnO (1.4%) and CoO (2%) mixed ZnO nanorods at room temperature. As there are 1.4% and 2% of Mn and Co present in the Mn and Co doped ZnO nanorods, respectively, hence the addition of same quantity of MnO and CoO powder to the pristine ZnO nanorod sample.
